# Supplementary material for: Refinement of Animal Model of Colorectal Carcinogenesis through the Definition of Novel Humane Endpoints
Source: MDPI journal article supplement (doi:10.3390/ani11040985), 2021-04-01
Supplement: s1 [file s1]

## Supplementary Materials

Article

# Refinement of animal model of colorectal carcinogenesis through the definition of novel humane endpoints

Rita Silva-Reis<sup>1</sup>, Ana I. Faustino-Rocha<sup>1,2</sup>, Mariana Gonçalves<sup>1</sup>, Catarina Castro Ribeiro<sup>1</sup>, Tiago Ferreira<sup>1</sup>, CM Ribeiro-Silva<sup>1</sup>, Lio Gonçalves<sup>3,4</sup>, Luís Antunes<sup>1,5</sup>, Carlos Venâncio<sup>1,6</sup>, Rita Ferreira<sup>7</sup>, Adelina Gama<sup>5,8</sup>, Paula A. Oliveira<sup>1,7</sup>

<sup>1</sup> Center for the Research and Technology of Agro-Environmental and Biological Sciences (CITAB), University of Trás-os-Montes and Alto Douro (UTAD), Vila Real, Portugal

<sup>2</sup> Department of Zootecnics, School of Sciences and Technology, University of Évora, Évora, Portugal

<sup>3</sup> Engineering Department, UTAD, Vila Real, Portugal

<sup>4</sup> Institute for Systems and Computer Engineering, Technology and Science, Porto, Portugal

<sup>5</sup> Department of Veterinary Sciences, UTAD, Vila Real, Portugal

<sup>6</sup> Department of Animal Sciences, UTAD, Vila Real, Portugal

<sup>7</sup> Associated Laboratory for Green Chemistry (REQUIMTE), Department of Chemistry, University of Aveiro (UA), Aveiro, Portugal

<sup>8</sup> Animal and Veterinary Research Center (CECAV), UTAD, Vila Real, Portugal

\* Correspondence: pamo@utad.pt

Received: date; Accepted: date; Published: date

**Table S1.** Initial and final corrected BW, food and water intake in the first and last weeks of the experimental protocol. All data is presented as mean  $\pm$  S.D.

| Group       | Body weight (g)  |                               | Food consumption (g) |                | Water consumption (ml) |                |
|-------------|------------------|-------------------------------|----------------------|----------------|------------------------|----------------|
|             | Initial          | Final                         | Initial              | Final          | Initial                | Final          |
| CTRL1 (n=6) | 223.4 $\pm$ 10.2 | 409.0 $\pm$ 19.7              | 20.7 $\pm$ 0.2       | 26.3 $\pm$ 0.2 | 29.7 $\pm$ 2.6         | 26.3 $\pm$ 0.7 |
| CRC1 (n=8)  | 222.4 $\pm$ 4.3  | 366.4 $\pm$ 38.9 <sup>a</sup> | 23.2 $\pm$ 0.7       | 25.6 $\pm$ 1.7 | 25.9 $\pm$ 4.5         | 20.9 $\pm$ 3.8 |
| CTRL2 (n=6) | 229.1 $\pm$ 14.6 | 441.1 $\pm$ 34.8              | 23.7 $\pm$ 0.1       | 27.3 $\pm$ 1.1 | 29.6 $\pm$ 0.5         | 23.0 $\pm$ 0.7 |
| CRC2 (n=9)  | 225.8 $\pm$ 7.9  | 393.9 $\pm$ 36.7              | 23.8 $\pm$ 0.4       | 27.8 $\pm$ 0.6 | 28.1 $\pm$ 0.9         | 20.9 $\pm$ 1.9 |

<sup>a</sup> Statistically different from group CTRL2 ( $p < 0.05$ ). Control groups (CTRL1 and 2) injected with EDTA-saline and induced groups (CRC1 and 2). Groups 1 and 2 were euthanized 11 and 17 weeks after the first administration, respectively.

**Figure S1.** Animals' mean body weight *per week*. Control groups (CTRL1 and 2) injected with ethylenediamine tetraacetic acid (EDTA)-saline and induced groups (CRC1 and 2) injected with 1,2-dimethylhydrazine (DMH). Groups 1 and 2 were euthanized 11 and 17 weeks after the first administration, respectively.

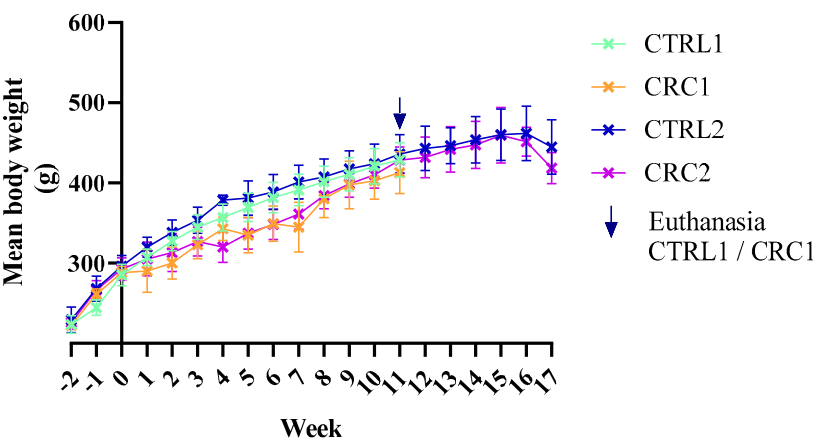

**Figure S2.** Animals' mean back and abdominal body temperature *per week*. Control groups (CTRL1 and 2) injected with ethylenediamine tetraacetic acid (EDTA)-saline and induced groups (CRC1 and 2) injected with 1,2-dimethylhydrazine (DMH). Groups 1 and 2 were euthanized 11 and 17 weeks after the first administration, respectively.

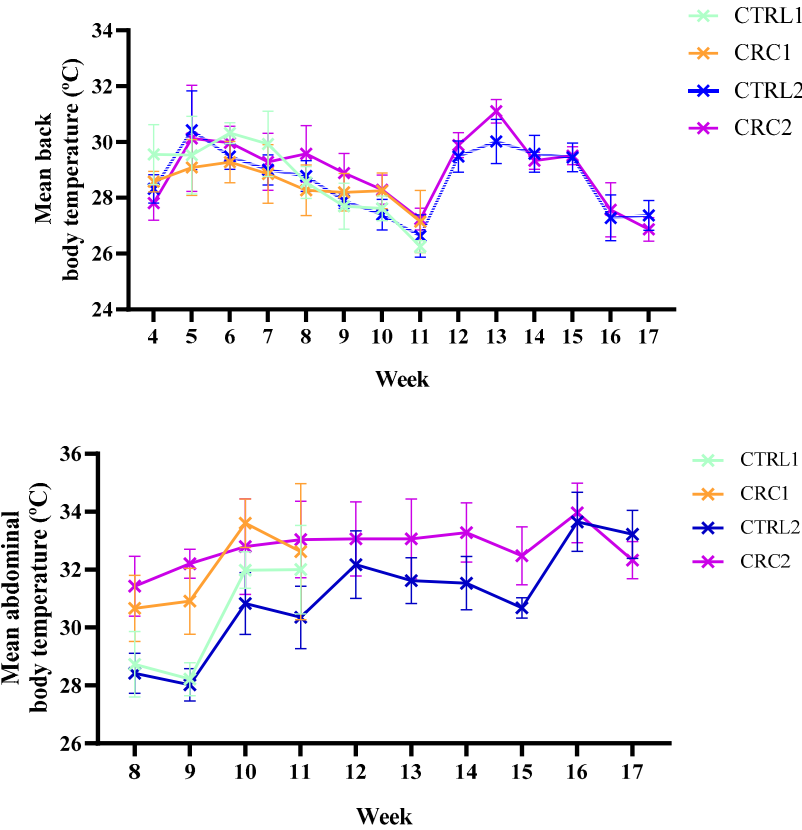

**Table S1.** Individual score assigned to each animal *per week*.

| Group | Rat | Individual HE score per week |                |                |                |                   |                   |                   |                   |                      |                      |                      |                      |                      |                      |                      |                      |                      |  |  |  |  |  |
|-------|-----|------------------------------|----------------|----------------|----------------|-------------------|-------------------|-------------------|-------------------|----------------------|----------------------|----------------------|----------------------|----------------------|----------------------|----------------------|----------------------|----------------------|--|--|--|--|--|
|       |     | 1                            | 2              | 3              | 4              | 5                 | 6                 | 7                 | 8                 | 9                    | 10                   | 11                   | 12                   | 13                   | 14                   | 15                   | 16                   | 17                   |  |  |  |  |  |
| CTRL1 | 1   | 1 <sup>d</sup>               | 1 <sup>d</sup> | 1 <sup>d</sup> | 1 <sup>d</sup> | 1 <sup>d</sup>    | 1 <sup>d</sup>    | 1 <sup>d</sup>    | 1 <sup>d</sup>    | 1 <sup>d</sup>       | 1 <sup>d</sup>       | 1 <sup>d</sup>       |                      |                      |                      |                      |                      |                      |  |  |  |  |  |
|       | 2   | 1 <sup>d</sup>               | 1 <sup>d</sup> | 1 <sup>d</sup> | 1 <sup>d</sup> | 1 <sup>d</sup>    | 1 <sup>d</sup>    | 1 <sup>d</sup>    | 1 <sup>d</sup>    | 1 <sup>d</sup>       | 1 <sup>d</sup>       | 1 <sup>d</sup>       |                      |                      |                      |                      |                      |                      |  |  |  |  |  |
|       | 3   | 0                            | 1 <sup>d</sup> | 1 <sup>d</sup> | 1 <sup>d</sup> | 1 <sup>d</sup>    | 1 <sup>d</sup>    | 1 <sup>d</sup>    | 1 <sup>d</sup>    | 1 <sup>d</sup>       | 1 <sup>d</sup>       | 1 <sup>d</sup>       |                      |                      |                      |                      |                      |                      |  |  |  |  |  |
|       | 4   | 1 <sup>d</sup>               | 1 <sup>d</sup> | 0              | 0              | 0                 | 1 <sup>d</sup>    | 1 <sup>d</sup>    | 1 <sup>d</sup>    | 1 <sup>d</sup>       | 1 <sup>d</sup>       | 1 <sup>d</sup>       |                      |                      |                      |                      |                      | 1 <sup>d</sup>       |  |  |  |  |  |
|       | 5   | 1 <sup>d</sup>               | 1 <sup>d</sup> | 1 <sup>d</sup> | 1 <sup>d</sup> | 1 <sup>d</sup>    | 1 <sup>d</sup>    | 1 <sup>d</sup>    | 1 <sup>d</sup>    | 1 <sup>d</sup>       | 1 <sup>d</sup>       | 1 <sup>d</sup>       |                      |                      |                      |                      |                      | 1 <sup>d</sup>       |  |  |  |  |  |
|       | 6   | 0                            | 0              | 0              | 0              | 0                 | 0                 | 0                 | 0                 | 0                    | 1 <sup>d</sup>       | 1 <sup>d</sup>       |                      |                      |                      |                      |                      |                      |  |  |  |  |  |
| CRC1  | 1   | 0                            | 0              | 0              | 0              | 0                 | 1 <sup>g</sup>    | 2 <sup>b, g</sup> |                   |                      |                      |                      |                      |                      |                      |                      |                      |                      |  |  |  |  |  |
|       | 2   | 0                            | 0              | 0              | 0              | 0                 | 0                 | 0                 | 1 <sup>d</sup>    | 1 <sup>d</sup>       | 1 <sup>d</sup>       | 1 <sup>d</sup>       |                      |                      |                      |                      |                      |                      |  |  |  |  |  |
|       | 3   | 0                            | 0              | 0              | 0              | 0                 | 2 <sup>a, j</sup> | 2 <sup>a, j</sup> | 2 <sup>a, j</sup> | 3 <sup>a, d, j</sup> |                      |                      |                      |                      |                      |                      |                      |                      |  |  |  |  |  |
|       | 4   | 3 <sup>b, d, c</sup>         | 0              | 0              | 1 <sup>d</sup> | 1 <sup>d</sup>    | 1 <sup>d</sup>    | 1 <sup>d</sup>    | 1 <sup>d</sup>    | 1 <sup>d</sup>       | 1 <sup>d</sup>       | 1 <sup>d</sup>       |                      |                      |                      |                      |                      |                      |  |  |  |  |  |
|       | 5   | 0                            | 0              | 0              | 0              | 0                 | 0                 | 1 <sup>d</sup>    | 1 <sup>d</sup>    | 1 <sup>g</sup>       | 2 <sup>a, g</sup>    | 1 <sup>a</sup>       |                      |                      |                      |                      |                      |                      |  |  |  |  |  |
|       | 6   | 0                            | 1 <sup>d</sup> | 0              | 1 <sup>d</sup> | 1 <sup>d</sup>    | 1 <sup>d</sup>    | 0                 | 0                 | 0                    | 0                    | 0                    |                      |                      |                      |                      |                      |                      |  |  |  |  |  |
|       | 7   | 0                            | 0              | 0              | 0              | 0                 | 0                 | 0                 | 0                 | 0                    | 1 <sup>d</sup>       | 0                    |                      |                      |                      |                      |                      |                      |  |  |  |  |  |
|       | 8   | 0                            | 1 <sup>d</sup> | 1 <sup>d</sup> | 1 <sup>d</sup> | 0                 | 0                 | 1 <sup>d</sup>    | 1 <sup>d</sup>    | 1 <sup>d</sup>       | 2 <sup>a, d</sup>    | 2 <sup>a, d</sup>    |                      |                      |                      |                      |                      |                      |  |  |  |  |  |
| CTRL2 | 1   | 1 <sup>d</sup>               | 1 <sup>d</sup> | 1 <sup>d</sup> | 1 <sup>d</sup> | 1 <sup>d</sup>    | 1 <sup>d</sup>    | 1 <sup>d</sup>    | 1 <sup>d</sup>    | 1 <sup>d</sup>       | 1 <sup>d</sup>       | 1 <sup>d</sup>       | 1 <sup>d</sup>       | 1 <sup>d</sup>       | 1 <sup>d</sup>       | 1 <sup>d</sup>       | 1 <sup>d</sup>       | 1 <sup>d</sup>       |  |  |  |  |  |
|       | 2   | 0                            | 0              | 0              | 0              | 1 <sup>d</sup>    | 1 <sup>d</sup>    | 1 <sup>d</sup>    | 1 <sup>d</sup>    | 1 <sup>d</sup>       | 1 <sup>d</sup>       | 1 <sup>d</sup>       | 1 <sup>d</sup>       | 1 <sup>d</sup>       | 1 <sup>d</sup>       | 1 <sup>d</sup>       | 1 <sup>d</sup>       | 1 <sup>d</sup>       |  |  |  |  |  |
|       | 3   | 0                            | 1 <sup>d</sup> | 1 <sup>d</sup> | 1 <sup>d</sup> | 1 <sup>d</sup>    | 1 <sup>d</sup>    | 1 <sup>d</sup>    | 1 <sup>d</sup>    | 1 <sup>d</sup>       | 1 <sup>d</sup>       | 1 <sup>d</sup>       | 1 <sup>d</sup>       | 1 <sup>d</sup>       | 1 <sup>d</sup>       | 1 <sup>d</sup>       | 1 <sup>d</sup>       | 1 <sup>d</sup>       |  |  |  |  |  |
|       | 4   | 0                            | 0              | 0              | 0              | 0                 | 0                 | 0                 | 0                 | 0                    | 0                    | 0                    | 0                    | 0                    | 0                    | 0                    | 0                    | 0                    |  |  |  |  |  |
|       | 5   | 0                            | 0              | 0              | 1 <sup>d</sup> | 0                 | 0                 | 0                 | 0                 | 0                    | 0                    | 0                    | 0                    | 0                    | 1 <sup>d</sup>       | 1 <sup>d</sup>       | 1 <sup>d</sup>       | 1 <sup>d</sup>       |  |  |  |  |  |
|       | 6   | 0                            | 0              | 0              | 0              | 0                 | 0                 | 0                 | 0                 | 0                    | 1 <sup>d</sup>       | 1 <sup>d</sup>       | 1 <sup>d</sup>       | 1 <sup>d</sup>       | 1 <sup>d</sup>       | 1 <sup>d</sup>       | 1 <sup>d</sup>       | 1 <sup>d</sup>       |  |  |  |  |  |
| CRC2  | 1   | 0                            | 0              | 0              | 0              | 0                 | 0                 | 0                 | 0                 | 1 <sup>d</sup>       | 2 <sup>a, d</sup>    | 3 <sup>a, d, j</sup> | 3 <sup>a, d, j</sup> | 3 <sup>a, d, j</sup> | 3 <sup>a, d, j</sup> |                      |                      |                      |  |  |  |  |  |
|       | 2   | 1 <sup>d</sup>               | 0              | 0              | 1 <sup>d</sup> | 1 <sup>d</sup>    | 1 <sup>d</sup>    | 1 <sup>d</sup>    | 1 <sup>d</sup>    | 1 <sup>d</sup>       | 1 <sup>d</sup>       | 2 <sup>d, g</sup>    | 1 <sup>d</sup>       | 1 <sup>d</sup>       | 1 <sup>d</sup>       | 2 <sup>a, d</sup>    | 3 <sup>a, d, j</sup> |                      |  |  |  |  |  |
|       | 3   | 1 <sup>d</sup>               | 0              | 3 <sup>l</sup> | 3 <sup>l</sup> | 0                 | 0                 | 2 <sup>d, j</sup> | 2 <sup>d, j</sup> | 2 <sup>d, j</sup>    | 2 <sup>d, g</sup>    | 2 <sup>d, g</sup>    | 0                    | 0                    | 0                    | 1 <sup>d</sup>       | 1 <sup>d</sup>       | 1 <sup>d</sup>       |  |  |  |  |  |
|       | 4   | 0                            | 0              | 0              | 0              | 0                 | 0                 | 0                 | 1 <sup>d</sup>    | 1 <sup>d</sup>       | 1 <sup>d</sup>       | 1 <sup>d</sup>       | 1 <sup>d</sup>       | 1 <sup>d</sup>       | 1 <sup>d</sup>       | 2 <sup>d, g</sup>    | 2 <sup>d, g</sup>    | 2 <sup>d, g</sup>    |  |  |  |  |  |
|       | 5   | 0                            | 1 <sup>d</sup> | 1 <sup>d</sup> | 0              | 0                 | 0                 | 0                 | 0                 | 0                    | 0                    | 2 <sup>d, g</sup>    | 2 <sup>d, g</sup>    | 2 <sup>d, g</sup>    | 1 <sup>d</sup>       | 1 <sup>d</sup>       | 1 <sup>d</sup>       | 1 <sup>d</sup>       |  |  |  |  |  |
|       | 6   | 0                            | 0              | 0              | 1 <sup>d</sup> | 1 <sup>d</sup>    | 2 <sup>d, g</sup> | 0                 | 0                 | 1 <sup>d</sup>       | 1 <sup>d</sup>       | 2 <sup>d, g</sup>    | 1 <sup>d</sup>       | 0                    | 1 <sup>d</sup>       | 1 <sup>d</sup>       | 1 <sup>d</sup>       | 1 <sup>d</sup>       |  |  |  |  |  |
|       | 7   | 0                            | 0              | 0              | 1 <sup>d</sup> | 1 <sup>d</sup>    | 2 <sup>d, g</sup> | 0                 | 1 <sup>d</sup>    | 1 <sup>d</sup>       | 1 <sup>d</sup>       | 1 <sup>d</sup>       | 1 <sup>d</sup>       | 1 <sup>d</sup>       | 1 <sup>d</sup>       | 1 <sup>d</sup>       | 1 <sup>d</sup>       | 2 <sup>a, d, j</sup> |  |  |  |  |  |
|       | 8   | 0                            | 1 <sup>d</sup> | 1 <sup>d</sup> | 1 <sup>d</sup> | 1 <sup>d</sup>    | 2 <sup>a, d</sup> | 2 <sup>a, d</sup> | 1 <sup>a</sup>    | 2 <sup>a, d</sup>    | 2 <sup>a, d</sup>    | 2 <sup>a, d</sup>    | 2 <sup>a, d</sup>    | 2 <sup>a, d</sup>    | 2 <sup>a, d</sup>    | 3 <sup>a, d, j</sup> | 3 <sup>a, d, j</sup> | 3 <sup>a, d, j</sup> |  |  |  |  |  |
|       | 9   | 1 <sup>d</sup>               | 1 <sup>g</sup> | 1 <sup>d</sup> | 1 <sup>d</sup> | 2 <sup>d, g</sup> | 1 <sup>d</sup>    | 1 <sup>d</sup>    | 2 <sup>a, d</sup> | 2 <sup>a, d</sup>    | 3 <sup>a, d, j</sup> | 3 <sup>a, d, j</sup> | 3 <sup>a, d, j</sup> | 3 <sup>a, d, j</sup> |                      |                      |                      |                      |  |  |  |  |  |

<sup>a</sup> Body condition; <sup>b</sup> Body weight; <sup>c</sup> Posture; <sup>d</sup> Hair appearance and grooming; <sup>e</sup> Mucous Color; <sup>f</sup> Eyes, ears and whiskers; <sup>g</sup> Mental Status; <sup>h</sup> Response to external stimuli; <sup>i</sup> Hydration status; <sup>j</sup> Stool appearance; <sup>k</sup> Convulsions; <sup>l</sup> Dimension of damage caused by injections; <sup>m</sup> Macroscopic appearance of induced skin lesions; <sup>n</sup> Infection of induced skin lesions. Control groups (CTRL1 and 2) injected with ethylenediamine tetraacetic acid (EDTA)-saline and induced groups (CRC1 and 2) injected with 1,2-dimethylhydrazine (DMH). Groups 1 and 2 were euthanized 11 and 17 weeks after the first administration, respectively.

**Table S3.** New Scoring sheet for colorectal carcinogenesis chemically-induced by 1,2-dimethylhydrazine (DMH). Adapted from CCAC guidelines, Mason et al. (2004), Oliveira et al. (2017), Faustino-Rocha et al. (2019) [1–3]. Parameters added after this work are demarked in bold.

|                                                             | Parameter                    | Score                                     |                                           |                                                             |                                                                                     |
|-------------------------------------------------------------|------------------------------|-------------------------------------------|-------------------------------------------|-------------------------------------------------------------|-------------------------------------------------------------------------------------|
|                                                             |                              | 0                                         | 1                                         | 2                                                           | 3                                                                                   |
| General appearance and state of consciousness of the animal | <b>Body condition</b>        | Good                                      | <b>Underconditioned</b>                   | Emaciated                                                   | <b>Swollen abdomen and priapism</b>                                                 |
|                                                             | <b>Body mass*</b>            | Normal                                    | Loss/ <b>Gain 5-10%</b>                   | Loss/ <b>Gain 10-20%</b>                                    | Loss/ <b>Gain &gt;20%</b>                                                           |
|                                                             | Posture                      | Normal posture                            | Posture changes ( <b>hunched</b> posture) | ---                                                         | ---                                                                                 |
|                                                             | Aspect of hair and grooming  | Normal                                    | Lack of grooming                          | ---                                                         | ---                                                                                 |
|                                                             | <b>Chromodachryorrhea</b>    | <b>Absence</b>                            | <b>Slight</b>                             | <b>Noticeable</b>                                           | <b>Well-marked</b>                                                                  |
|                                                             | <b>Abdominal Temperature</b> | <b>To be determined in a future work.</b> |                                           |                                                             |                                                                                     |
|                                                             | Mucous color                 | Normal                                    | Slightly anemic                           | Moderately anemic                                           | Severe anemia                                                                       |
|                                                             | <b>Grimace changes</b>       | Normal                                    | ---                                       | <b>Partially closed eyes, droopy ears, forward whiskers</b> | <b>Completely closed eyes, droopy and curved ears, forward and bunched whiskers</b> |
|                                                             | Mental status                | Normal                                    | <b>Slight apathy</b>                      | <b>Inactive</b>                                             | Stupor / Coma                                                                       |
|                                                             | Response to external stimuli | Normal                                    | Moderate response                         | Moderate response with vocalization                         | Violent response                                                                    |
| Clinical signs                                              | Hydration status             | Normal                                    | ---                                       | <b>Abnormal skin pinch test (&gt; 2 sec.)</b>               | ---                                                                                 |
|                                                             | Appearance of stool          | Normal                                    | Diarrhea                                  | Black (digested blood)                                      | Bloody Stool                                                                        |

|                                                |         |                                  |                                                |                                   |
|------------------------------------------------|---------|----------------------------------|------------------------------------------------|-----------------------------------|
| Convulsions                                    | Absence | ---                              | ---                                            | Presence                          |
| Dimension of damage caused by injections       | Absence | Lesion with diameter $\leq 8$ mm | Lesion with diameter $\geq 9$ and $\leq 14$ mm | Lesion with diameter $\geq 15$ mm |
| Macroscopic appearance of induced skin lesions | Absence | ---                              | ---                                            | Presence of necrosis              |
| Infection of induced skin lesions              | Absence | ---                              | ---                                            | Presence of inflammatory exudate  |

\* The body weight parameter must consider the body weight increase due to growth, being adjusted for each study

**Recommendation - A total clinical score of 6 or a score of 3 in a single parameter indicates the need of urgent euthanasia.**

## References

1. Mason, G.; Wilson, D.; Hampton, C.; Würbel, H. Non-invasively Assessing Disturbance and Stress in Laboratory Rats by Scoring Chromodacryorrhoea. *Altern. to Lab. Anim.* **2004**, *32*, 153–159, doi:10.1177/026119290403201s25.
2. Faustino-Rocha, A.I.; Ginja, M.; Ferreira, R.; Oliveira, P.A. Studying humane endpoints in a rat model of mammary carcinogenesis. *Iran. J. Basic Med. Sci.* **2019**, *22*, 643–649, doi:10.22038/ijbms.2019.33331.7957.
3. Oliveira, M.; Nascimento-gonçalves, E.; Silva, J.; Oliveira, P.A.; Ferreira, R.; Antunes, L.; Arantes-rodrigues, R.; Faustino-rocha, A.N.A.I. Implementation of Human Endpoints in a Urinary Bladder Carcinogenesis Study in Rats. *In Vivo (Brooklyn)*. **2017**, *31*, 1073–1080, doi:10.21873/invivo.11172.
